# Supplementary material for: Foamed single-crystalline anatase nanocrystals exhibiting enhanced photocatalytic activity
Source: Royal Society of Chemistry journal article supplement (doi:10.1039/c5ta04682c), 2015-01-01
Supplement: c5ta04682c1.pdf [file c5ta04682c1.pdf]

## Supplementary Information

# Foamed Single-Crystalline Anatase Nanocrystals Exhibiting Enhanced Photocatalytic Activity

Shaohong Liu, Wei Wang, Jialin Chen, Ji-Guang Li, Xiaodong Li, Xudong Sun, Yu Dong

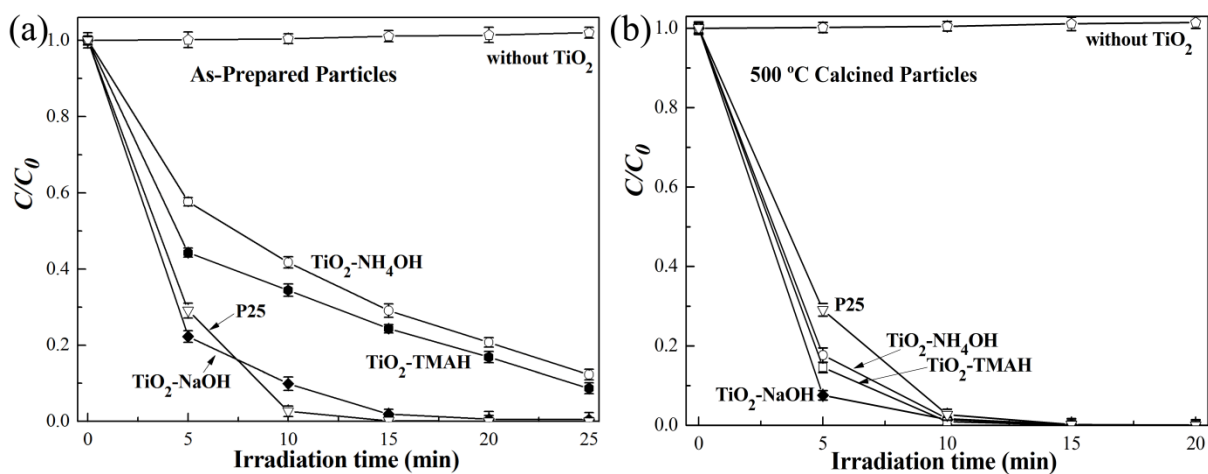

**Figure S1.** Photocatalytic degradation of methyl orange under UV irradiation, with (a) over the multicrystalline precursor nanoparticles and (b) over the calcination-derived single crystals.  $C$  and  $C_0$  denote the 465 nm absorbance of methyl orange after and before irradiation, respectively. The results obtained with P25 are included for comparison. The standard deviations are given as error bars.
